# Supplementary material for: A species-specific double isotope dilution strategy for the accurate quantification of platinum–GG adducts in lung cells exposed to carboplatin
Source: Royal Society of Chemistry journal article supplement (doi:10.1039/c7ja00078b), 2017-01-01
Supplement: c7ja00078b1.pdf [file c7ja00078b1.pdf]

## Electronic Supplementary Information

### **A SPECIES-SPECIFIC DOUBLE ISOTOPE DILUTION STRATEGY FOR THE ACCURATE QUANTIFICATION OF PLATINUM-GG ADDUCTS IN LUNG CELLS EXPOSED TO CARBOPLATIN**

Susana Cuello-Nuñez<sup>a</sup>, Raquel Larios<sup>a</sup>, Christian Deitrich<sup>a</sup>, Tamara Lekishvili<sup>a</sup>, Volker Nischwitz<sup>b</sup>,  
Barry L. Sharp<sup>c</sup> and Heidi Goenaga-Infante<sup>a\*</sup>

<sup>a</sup> LGC Limited, Queens Road, Teddington, Middlesex TW11 0LY, UK.

<sup>b</sup> Central Institute for Engineering, Electronics and Analytics, Analytics (ZEA-3),  
Forschungszentrum Jülich GmbH, Wilhelm Johnenstraße, 52425 Jülich, Germany.

<sup>c</sup> Centre for Analytical Science, Department of Chemistry,

<sup>d</sup> Loughborough University, Loughborough, Leicestershire LE11 3TU

\* corresponding author

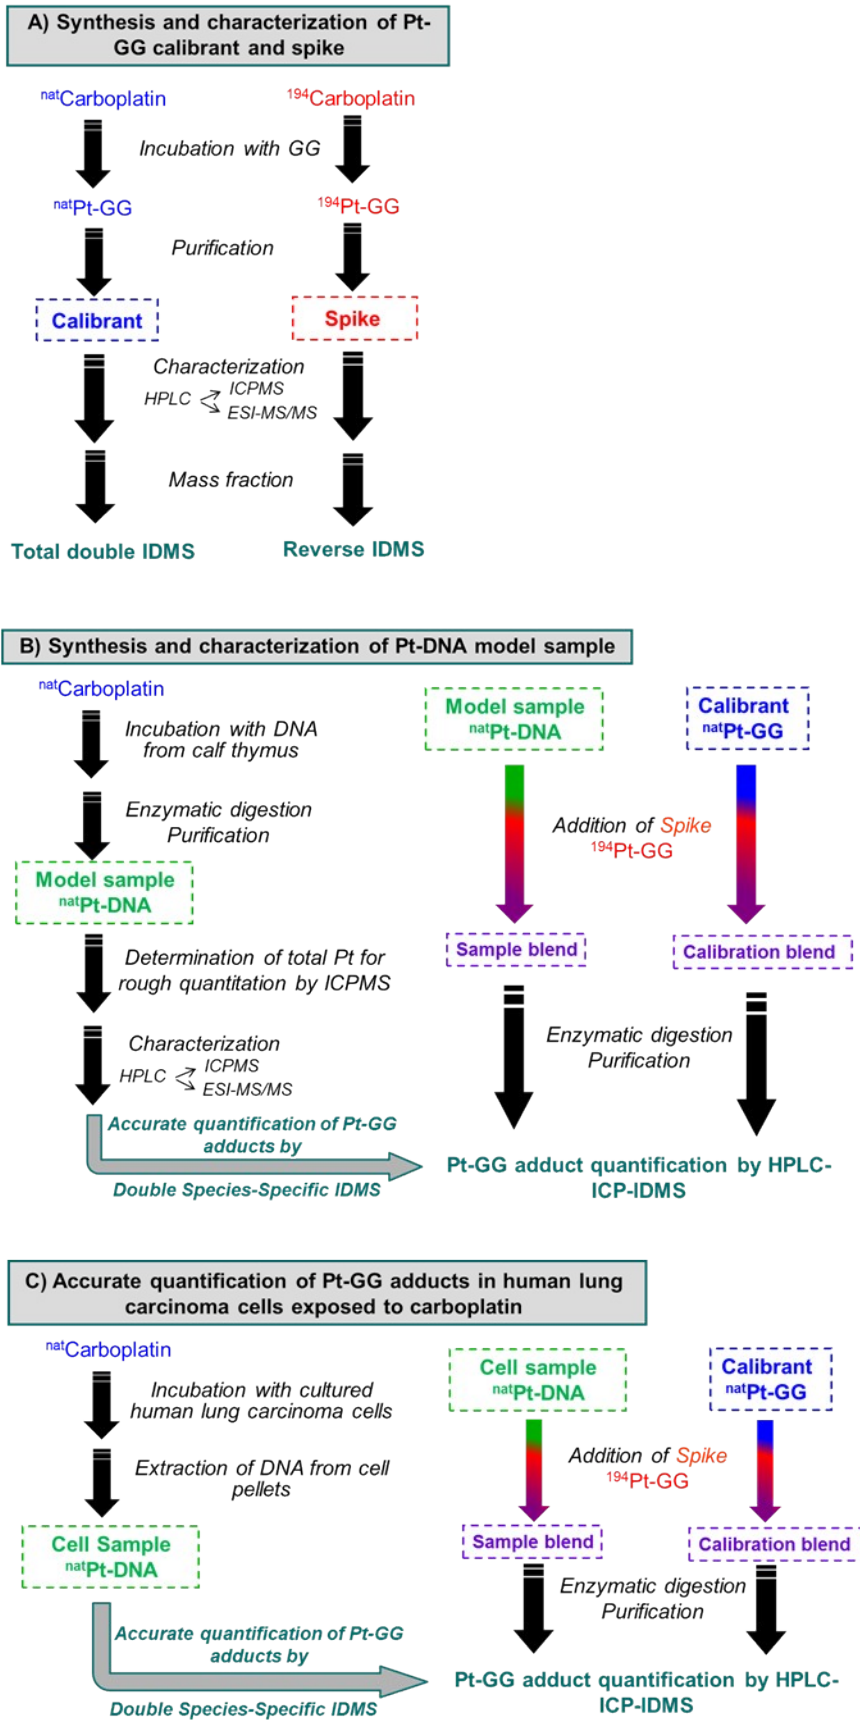

Fig. ESI-1 Workflow of the entire SI-traceable quantification protocol of the Pt-GG adducts
